# Supplementary material
Source: MDPI journal article supplement (https://www.mdpi.com/2075-163X/11/5/537)
Supplement: s1 [file s1]

# Long-term arsenic sequestration in biogenic pyrite from contaminated groundwater: Insights from field and laboratory studies

## Supplementary Materials

**Table S1.** Groundwater pH versus collection date of samples.

| Well  | 05/15/2018<br>(Pre-Injection) | 06/28/2018<br>(Week 1) | 07/06/2018<br>(Week 2) | 07/12/2018<br>(Week 3) | 07/19/2018<br>(Month 1) | 08/23/2018<br>(Month 2) | 09/20/2018<br>(Month 3) | 12/14/2018<br>(Month 6) | 03/18/2019<br>(Month 9) |
|-------|-------------------------------|------------------------|------------------------|------------------------|-------------------------|-------------------------|-------------------------|-------------------------|-------------------------|
| I-1   | 6.8                           | 4.43                   | 5.8                    | 6.17                   | 6.4                     | 6.03                    | 6                       | 6.3                     | 6.18                    |
| I-2   | 6.47                          | 4.85                   | 5.75                   | 6.05                   | 6.16                    | 6.12                    | 6.1                     | 6.21                    | 6.16                    |
| I-3   | 6.54                          | 4.81                   | 5.51                   | 5.64                   | 6.02                    | 5.50                    | 6.03                    | 5.9                     | 5.68                    |
| I-4   | 6.08                          | 4.46                   | 5.02                   | 5.29                   | 5.18                    | 5.24                    | 5.27                    | 5.14                    | 5.31                    |
| I-5   | 5.61                          | 4.23                   | 5.38                   | 5.23                   | 4.75                    | 5.71                    | 5.56                    | 5.57                    | 5.64                    |
| I-6   | 6.83                          | 5.06                   | 5.5                    | 5.62                   | 5.69                    | 6.02                    | 6.18                    | 6.65                    | 6.38                    |
| I-7   | 6.93                          | 5.77                   | 6.58                   | 6.69                   | 6.68                    | 6.49                    | 6.43                    | 6.76                    | 6.26                    |
| I-8   | 5.13                          | 4.63                   | 4.25                   | 4.35                   | 4.66                    | 4.34                    | 4.85                    | 5.16                    | 5.33                    |
| I-9   | 5.74                          | 5.44                   | 5.41                   | 5.57                   | 5.67                    | 5.37                    | 5.64                    | 5.57                    | 5.64                    |
| I-10  | 6.63                          | 6.25                   | 6.16                   | 6.12                   | 6.12                    | 6.17                    | 6.35                    | 6.34                    | 6.05                    |
| I-11  | 5.95                          | 4.77                   | 5.18                   | 4.88                   | 4.52                    | 5.58                    | 5.61                    | 6.14                    | 5.73                    |
| LH-2  | 5.47                          | 5.19                   | 5.09                   | 5.11                   | 5.16                    | 4.75                    | 4.95                    | 5.15                    | 5.18                    |
| LH-4  | 6.2                           | 5.82                   | 5.84                   | 5.79                   | 5.83                    | 5.77                    | 5.95                    | 5.83                    | 5.9                     |
| LH-5  | 6.96                          | 6.57                   | 6.62                   | 6.57                   | 6.68                    | 5.95                    | 6.05                    | 6.01                    | 5.96                    |
| LH-7  | 5.96                          | 5.64                   | 5.62                   | 5.52                   | 5.63                    | 5.62                    | 5.7                     | 5.93                    | 5.91                    |
| LH-10 | 6.65                          | 6.36                   | 5.67                   | 5.65                   | 5.8                     | 5.90                    | 6.37                    | 6.2                     | 6.02                    |
| M-1   | 6.14                          | 4.65                   | 4.78                   | 4.68                   | 5                       | 5.08                    | 5.15                    | 5.39                    | 5.54                    |
| M-3   | 5.62                          | 5.2                    | 5.32                   | 5.14                   | 5.3                     | 5.37                    | 5.58                    | 5.51                    | 5.47                    |
| RA-9  | 6.77                          | 6.23                   | 6.23                   | 6.14                   | 6.14                    | 5.70                    | 5.87                    | 5.84                    | 5.83                    |
| RA-10 | 6.93                          | 5.9                    | 5.41                   | 6.77                   | 6.24                    | 6.66                    | 6.38                    | 6.71                    | 6.53                    |
| RA-11 | 7.33                          | 6.97                   | 6.83                   | 6.76                   | 6.93                    | 6.41                    | 6.45                    | 6.27                    | 6.21                    |
| RA-12 | 6.45                          | 6.16                   | 6.18                   | 6.16                   | 6.19                    | 5.72                    | 5.59                    | 5.58                    | 5.5                     |
| RA-13 | 5.25                          | 5.52                   | 5.42                   | 4.8                    | 5.35                    | 5.84                    | 6                       | 5.88                    | 5.71                    |
| RA-14 | 6.31                          | 6.22                   | 6.07                   | 6.01                   | 6.1                     | 6.41                    | 6.38                    | 6.5                     | 6.15                    |

**Table S2.** Groundwater oxidation-reduction potential (ORP) (mV) versus collection date of samples.

| Well  | 05/15/2018<br>(Pre-Injection) | 06/28/2018<br>(Week 1) | 07/06/2018<br>(Week 2) | 07/12/2018<br>(Week 3) | 07/19/2018<br>(Month 1) | 08/23/2018<br>(Month 2) | 09/20/2018<br>(Month 3) | 12/14/2018<br>(Month 6) | 03/18/2019<br>(Month 9) |
|-------|-------------------------------|------------------------|------------------------|------------------------|-------------------------|-------------------------|-------------------------|-------------------------|-------------------------|
| I-1   | -5                            | -7                     | -99                    | -138                   | -131                    | -219                    | 36                      | 81                      | -66                     |
| I-2   | 33                            | 66                     | -184                   | -161                   | -142                    | -30                     | 44                      | -27                     | 2                       |
| I-3   | 37                            | -2                     | -141                   | -133                   | -189                    | -244                    | -25                     | -85                     | -37                     |
| I-4   | 30                            | 21                     | -78                    | -94                    | 25                      | -57                     | -15                     | -30                     | 11                      |
| I-5   | 48                            | 25                     | -94                    | -90                    | -42                     | -114                    | 42                      | -25                     | -1                      |
| I-6   | 44                            | -53                    | -129                   | -118                   | -87                     | -139                    | 9                       | -70                     | -14                     |
| I-7   | 79                            | -83                    | -180                   | -165                   | -132                    | -141                    | 43                      | -163                    | -10                     |
| I-8   | 28                            | -4                     | 85                     | 184                    | 128                     | -33                     | 24                      | -30                     | 11                      |
| I-9   | 9                             | 39                     | -1                     | 52                     | 51                      | -2                      | 2                       | -9                      | 6                       |
| I-10  | 62                            | 56                     | 27                     | 43                     | 39                      | 17                      | 4                       | 46                      | 24                      |
| I-11  | 55                            | 25                     | -52                    | -10                    | 25                      | -84                     | 41                      | -56                     | 12                      |
| LH-2  | -7                            | 12                     | 5                      | 38                     | 52                      | -111                    | 25                      | -63                     | -7                      |
| LH-4  | 48                            | 22                     | -9                     | 12                     | 15                      | -13                     | -11                     | -10                     | 9                       |
| LH-5  | 38                            | -38                    | -18                    | -11                    | -42                     | -261                    | -56                     | -74                     | -75                     |
| LH-7  | 61                            | 21                     | 16                     | 2                      | 13                      | -12                     | -22                     | -34                     | 20                      |
| LH-10 | 20                            | -66                    | 14                     | -135                   | -158                    | -262                    | -32                     | -153                    | -92                     |
| M-1   | 4                             | -31                    | 8                      | -99                    | -89                     | -237                    | 67                      | -93                     | 56                      |
| M-3   | 55                            | -1                     | -40                    | -36                    | 7                       | -111                    | -26                     | -86                     | -36                     |
| RA-9  | 45                            | -9                     | -39                    | -93                    | -72                     | -248                    | -17                     | -77                     | -34                     |
| RA-10 | 73                            | -26                    | -14                    | -6                     | -84                     | -131                    | -20                     | -118                    | -47                     |
| RA-11 | 74                            | 57                     | 19                     | 46                     | -17                     | 35                      | 79                      | 26                      | 3                       |
| RA-12 | 24                            | 46                     | -9                     | 84                     | 99                      | -58                     | 56                      | -57                     | 4                       |
| RA-13 | 19                            | -2                     | 19                     | 75                     | 80                      | -43                     | -3                      | -24                     | -23                     |
| RA-14 | 38                            | 19                     | 76                     | 90                     | -61                     | 47                      | 9                       | 99                      | 87                      |

**Table S3.** Dissolved oxygen (DO) (mg/L) versus collection date of samples.

| Well  | 05/15/2018<br>(Pre-Injection) | 06/28/2018<br>(Week 1) | 07/06/2018<br>(Week 2) | 07/12/2018<br>(Week 3) | 07/19/2018<br>(Month 1) | 08/23/2018<br>(Month 2) | 09/20/2018<br>(Month 3) | 12/14/2018<br>(Month 6) | 03/18/2019<br>(Month 9) |
|-------|-------------------------------|------------------------|------------------------|------------------------|-------------------------|-------------------------|-------------------------|-------------------------|-------------------------|
| I-1   | 1.21                          | 0.04                   | 0.08                   | 0.08                   | 0.1                     | 0.10                    | 0.14                    | 2.45                    | 0.05                    |
| I-2   | 2.61                          | 0.06                   | 0.06                   | 0.13                   | 0.12                    | 0.57                    | 0.14                    | 0.12                    | 0.17                    |
| I-3   | 0.93                          | 0.08                   | 0.13                   | 0.1                    | 0.08                    | 0.08                    | 0.16                    | 0.08                    | 0.09                    |
| I-4   | 0.54                          | 0.03                   | 0.16                   | 0.17                   | 0.12                    | 4.01                    | 0.15                    | 0.1                     | 0.05                    |
| I-5   | 0.07                          | 0.04                   | 0.07                   | 0.08                   | 0.13                    | 0.05                    | 0.14                    | 0.08                    | 0.08                    |
| I-6   | 0.05                          | 0.17                   | 0.06                   | 0.12                   | 0.07                    | 0.05                    | 0.11                    | 0.08                    | 0.07                    |
| I-7   | 0.09                          | 0.06                   | 0.07                   | 0.07                   | 0.07                    | 0.08                    | 0.15                    | 0.1                     | 0.07                    |
| I-8   | 0.5                           | 0.83                   | 0.68                   | 0.83                   | 0.26                    | 0.07                    | 0.14                    | 0.09                    | 0                       |
| I-9   | 0.01                          | 0.1                    | 0.08                   | 0.08                   | 0.38                    | 0.07                    | 0.14                    | 0.1                     | 0.06                    |
| I-10  | 0.15                          | 0.93                   | 0.61                   | 0.61                   | 0.22                    | 0.80                    | 0.62                    | 0.19                    | 0.37                    |
| I-11  | 0.08                          | 0.1                    | 0.13                   | 0.07                   | 0.14                    | 0.05                    | 0.13                    | 0.05                    | 0.06                    |
| LH-2  | 0.08                          | 0.08                   | 0.12                   | 0.1                    | 0.12                    | 0.10                    | 0.16                    | 0.08                    | 0.08                    |
| LH-4  | 0.15                          | 0.08                   | 0.13                   | 0.1                    | 0.09                    | 0.08                    | 0.15                    | 0.07                    | 0.08                    |
| LH-5  | 0.13                          | 0.28                   | 0.3                    | 0.2                    | 0.19                    | 0.09                    | 0.12                    | 0.1                     | 0.08                    |
| LH-7  | 0.08                          | 0.1                    | 0.27                   | 0.17                   | 0.18                    | 0.13                    | 0.14                    | 0.05                    | 0.1                     |
| LH-10 | 0.05                          | 0.06                   | 0.09                   | 0.08                   | 0.11                    | 0.07                    | 0.1                     | 0.07                    | 0.08                    |
| M-1   | 0.06                          | 0.06                   | 0.13                   | 0.1                    | 0.15                    | 0.09                    | 0.17                    | 0.09                    | 0.08                    |
| M-3   | 0.03                          | 0.07                   | 0.08                   | 0.14                   | 0.09                    | 0.08                    | 0.13                    | 0.06                    | 0.1                     |
| RA-9  | 1.89                          | 0.06                   | 0.12                   | 0.12                   | 0.15                    | 0.10                    | 0.12                    | 0.08                    | 0.06                    |
| RA-10 | 0.19                          | 0.06                   | 0.18                   | 0.11                   | 0.07                    | 0.06                    | 0.15                    | 0.09                    | 0.06                    |
| RA-11 | 0.09                          | 0.57                   | 0.37                   | 1.04                   | 0.57                    | 0.11                    | 1.57                    | 0.11                    | 0.05                    |
| RA-12 | 1.7                           | 2.83                   | 0.12                   | 2.52                   | 1.79                    | 0.17                    | 0.15                    | 0.07                    | 0.05                    |
| RA-13 | 1.12                          | 0.27                   | 0.11                   | 0.12                   | 0.18                    | 0.07                    | 0.13                    | 0.14                    | 0.05                    |
| RA-14 | 0.08                          | 2.76                   | 2.09                   | 1.99                   | 0.18                    | 0.20                    | 0.45                    | 1.63                    | 6.11                    |

**Table S4.** Dissolved arsenic (mg/L) versus collection date of filtered groundwater samples.

| Well  | 05/15/2018<br>(Pre-Injection) | 06/28/2018<br>(Week 1) | 07/06/2018<br>(Week 2) | 07/12/2018<br>(Week 3) | 07/19/2018<br>(Month 1) | 08/23/2018<br>(Month 2) | 09/20/2018<br>(Month 3) | 12/14/2018<br>(Month 6) | 03/18/2019<br>(Month 9) |
|-------|-------------------------------|------------------------|------------------------|------------------------|-------------------------|-------------------------|-------------------------|-------------------------|-------------------------|
| I-1   | 0.412                         | 0.183                  | 0.0484                 | 0.123                  | 0.176                   | 0.113                   | 0.18                    | 0.0966                  | 0.233                   |
| I-2   | 0.649                         | 0.803                  | 0.174                  | 0.17                   | 0.191                   | 0.518                   | 0.728                   | 1.02                    | 0.934                   |
| I-3   | 1.81                          | 0.0978                 | 0.107                  | 0.102                  | 0.444                   | 0.0474                  | 0.173                   | 0.233                   | 0.513                   |
| I-4   | 0.4                           | 0.15                   | 0.0126                 | 0.0283                 | 0.0543                  | 0.0303                  | 0.0369                  | 0.0405                  | 0.0825                  |
| I-5   | 0.111                         | 0.03                   | 0.068                  | 0.0387                 | 0.0606                  | 0.159                   | 0.094                   | 0.13                    | 0.171                   |
| I-6   | 0.0732                        | 0.0106                 | 0.00171                | 0.00369                | 0.00753                 | 0.0403                  | 0.048                   | 0.495                   | 0.0704                  |
| I-7   | 0.0932                        | 0.368                  | 0.113                  | 0.173                  | 0.2                     | 0.103                   | 0.0977                  | 0.102                   | 0.124                   |
| I-8   | 0.0168                        | 0.0123                 | 0.00633                | 0.00876                | 0.0154                  | 0.00806                 | 0.00698                 | 0.00808                 | 0.0204                  |
| I-9   | 0.00361                       | 0.00413                | 0.00661                | 0.00726                | 0.00428                 | 0.0184                  | 0.0221                  | 0.0393                  | 0.0418                  |
| I-10  | 0.00352                       | 0.00357                | 0.0029                 | 0.00358                | 0.00301                 | 0.00386                 | 0.00311                 | 0.00379                 | 0.00756                 |
| I-11  | 0.147                         | 0.0277                 | 0.015                  | 0.0236                 | 0.0105                  | 0.0175                  | 0.0167                  | 0.0219                  | 0.0835                  |
| LH-2  | 0.57                          | 0.506                  | 0.473                  | 0.569                  | 0.627                   | 0.032                   | 0.0279                  | 0.0351                  | 0.0122                  |
| LH-4  | 0.00116                       | 0.00221                | 0.00206                | 0.00193                | 0.00116                 | 0.00137                 | 0.0046                  | 0.00046                 | 0.00102                 |
| LH-5  | 0.318                         | 1.49                   | 1.06                   | 0.787                  | 0.823                   | 0.781                   | 0.86                    | 0.339                   | 0.439                   |
| LH-7  | 0.00388                       | 0.00363                | 0.00512                | 0.0036                 | 0.0058                  | 0.00259                 | 0.00108                 | 0.00298                 | 0.00421                 |
| LH-10 | 0.0132                        | 0.0198                 | 0.0124                 | 0.00566                | 0.00384                 | 0.00521                 | 0.00415                 | 0.00307                 | 0.00303                 |
| M-1   | 0.0835                        | 0.018                  | 0.0139                 | 0.0188                 | 0.023                   | 0.0177                  | 0.0176                  | 0.0157                  | 0.0128                  |
| M-3   | 0.141                         | 0.151                  | 0.193                  | 0.197                  | 0.285                   | 0.0643                  | 0.0487                  | 0.17                    | 0.0581                  |
| RA-9  | 0.768                         | 0.448                  | 0.618                  | 0.444                  | 0.722                   | 0.254                   | 0.4                     | 0.0785                  | 0.101                   |
| RA-10 | 0.210                         | 4.08                   | 8.65                   | 2.15                   | 7.12                    | 4.84                    | 1.71                    | 0.872                   | 0.538                   |
| RA-11 | 0.00733                       | 0.013                  | 0.0291                 | 0.0281                 | 0.0244                  | 0.0134                  | 0.0129                  | 0.0164                  | 0.0158                  |
| RA-12 | 0.0985                        | 0.0671                 | 0.101                  | 0.055                  | 0.0689                  | 0.2412                  | 0.232                   | 0.155                   | 0.305                   |
| RA-13 | 0.00144                       | 0.0031                 | 0.0046                 | 0.00499                | 0.00357                 | 0.00491                 | 0.00842                 | 0.0346                  | 0.0256                  |
| RA-14 | 0.00188                       | 0.00181                | 0.00198                | 0.00219                | 0.00265                 | 0.00172                 | 0.00204                 | 0.00135                 | 0.00239                 |

**Table S5.** Iron (Fe) (mg/L) versus collection date of groundwater samples.

| Well  | 05/15/2018<br>(Pre-Injection) | 06/28/2018<br>(Week 1) | 07/06/2018<br>(Week 2) | 07/12/2018<br>(Week 3) | 07/19/2018<br>(Month 1) | 08/23/2018<br>(Month 2) | 09/20/2018<br>(Month 3) | 12/14/2018<br>(Month 6) | 03/18/2019<br>(Month 9) |
|-------|-------------------------------|------------------------|------------------------|------------------------|-------------------------|-------------------------|-------------------------|-------------------------|-------------------------|
| I-1   | 1.25                          | 78.4                   | 15.1                   | 5.85                   | 2.71                    | 3.21                    | 1.6                     | 0.563                   | 1.41                    |
| I-2   | 1.12                          | 44.9                   | 15.7                   | 5.61                   | 3.4                     | 3.55                    | 2.35                    | 5.97                    | 6.43                    |
| I-3   | 0.681                         | 41.5                   | 18.3                   | 8.33                   | 4.64                    | 27.6                    | 4.99                    | 4.74                    | 12.3                    |
| I-4   | 2.07                          | 108                    | 25.6                   | 15.6                   | 13.5                    | 8.02                    | 9.61                    | 12.9                    | 18.4                    |
| I-5   | 1.08                          | 173                    | 20.7                   | 24.7                   | 49.9                    | 10.9                    | 9.01                    | 4.33                    | 4.59                    |
| I-6   | 1.53                          | 75.7                   | 30.3                   | 11.2                   | 12.5                    | 7.19                    | 3.31                    | 3.47                    | 3.48                    |
| I-7   | 0.221                         | 17.6                   | 1.96                   | 1.25                   | 1.28                    | 1.13                    | 1.25                    | 1.95                    | 0.891                   |
| I-8   | 1                             | 2.7                    | 1.76                   | 1.76                   | 1.36                    | 7.55                    | 7.51                    | 21.3                    | 26.6                    |
| I-9   | 0.789                         | 0.612                  | 0.943                  | 0.858                  | 0.666                   | 2.2                     | 2.4                     | 5.9                     | 10.4                    |
| I-10  | 0.892                         | 0.675                  | 0.942                  | 0.595                  | 0.764                   | 1.09                    | 0.681                   | 1.34                    | 3.04                    |
| I-11  | 3.78                          | 34.2                   | 14.3                   | 17.6                   | 39.7                    | 6.75                    | 6.58                    | 3.78                    | 3.35                    |
| LH-2  | 0.822                         | 1.31                   | 1.06                   | 0.935                  | 0.958                   | 16.7                    | 8.26                    | 2                       | 3.48                    |
| LH-4  | 0.494                         | 0.842                  | 0.504                  | 0.552                  | 0.73                    | 0.854                   | 1.13                    | 0.495                   | 0.914                   |
| LH-5  | 0.363                         | 0.402                  | 0.349                  | 0.317                  | 0.327                   | 2.24                    | 9.316                   | 4.63                    | 27.3                    |
| LH-7  | 1.95                          | 2.02                   | 1.81                   | 1.74                   | 1.83                    | 1.75                    | 1.17                    | 1.34                    | 0.871                   |
| LH-10 | 2.15                          | 2.28                   | 2.21                   | 3.3                    | 5.53                    | 5.68                    | 2.07                    | 1.67                    | 1.06                    |
| M-1   | 2.02                          | 96.9                   | 58.4                   | 36.5                   | 32.1                    | 29.1                    | 12.4                    | 3.79                    | 2.63                    |
| M-3   | 1.81                          | 1.04                   | 1.35                   | 0.614                  | 1.81                    | 0.763                   | 0.671                   | 1.83                    | 2.07                    |
| RA-9  | 0.308                         | 0.611                  | 0.755                  | 0.863                  | 1.14                    | 6.83                    | 3.21                    | 7.33                    | 8.5                     |
| RA-10 | 0.13                          | 23.7                   | 73.2                   | 1.77                   | 24.2                    | 24.4                    | 13.5                    | 3.57                    | 5.87                    |
| RA-11 | 0.348                         | 0.105                  | 0.298                  | 0.114                  | 0.408                   | 0.479                   | 0.352                   | 1.55                    | 3.31                    |
| RA-12 | 0.778                         | 0.33                   | 0.256                  | 0.0905                 | 0.17                    | 0.903                   | 9.15                    | 13.1                    | 14.9                    |
| RA-13 | 0.337                         | 0.38                   | 0.344                  | 0.31                   | 0.345                   | 0.793                   | 0.877                   | 4.3                     | 4.69                    |
| RA-14 | 0.663                         | 0.499                  | 0.229                  | 0.706                  | 0.425                   | 0.119                   | 0.232                   | 0.3                     | 0.534                   |

**Table S6.** Sulfate (SO<sub>4</sub>) (mg/L) versus collection date of groundwater samples.

| Well  | 05/15/2018<br>(Pre-Injection) | 06/28/2018<br>(Week 1) | 07/06/2018<br>(Week 2) | 07/12/2018<br>(Week 3) | 07/19/2018<br>(Month 1) | 08/23/2018<br>(Month 2) | 09/20/2018<br>(Month 3) | 12/14/2018<br>(Month 6) | 03/18/2019<br>(Month 9) |
|-------|-------------------------------|------------------------|------------------------|------------------------|-------------------------|-------------------------|-------------------------|-------------------------|-------------------------|
| I-1   | 17.9                          | 98.7                   | 11.6                   | 12.8                   | 16.2                    | 111                     | 78.5                    | 33.9                    | 13.4                    |
| I-2   | 21.4                          | 85.8                   | 126                    | 125                    | 114                     | 110                     | 61.4                    | 8.94                    | 1.4                     |
| I-3   | 21.5                          | 127                    | 83.5                   | 78.8                   | 86.7                    | 86.8                    | 21.4                    | 1.4                     | 7.83                    |
| I-4   | 19.7                          | 153                    | 14                     | 30.6                   | 13.2                    | 144                     | 23.8                    | 1.4                     | 8.28                    |
| I-5   | 16.5                          | 275                    | 66                     | 40.7                   | 50.9                    | 45.5                    | 29                      | 23                      | 12.3                    |
| I-6   | 17.4                          | 134                    | 33.9                   | 14.2                   | 9.97                    | 63.3                    | 24.5                    | 35.9                    | 23.4                    |
| I-7   | 21.9                          | 30.4                   | 18.6                   | 21.6                   | 17.5                    | 6.7                     | 17.1                    | 9.2                     | 5.32                    |
| I-8   | 32.7                          | 40.7                   | 44.5                   | 33.2                   | 43.3                    | 43.5                    | 12.7                    | 1.4                     | 5.83                    |
| I-9   | 8.62                          | 13.2                   | 12.9                   | 16.8                   | 18.4                    | 17.5                    | 1.4                     | 1.4                     | 2.79                    |
| I-10  | 20                            | 10.9                   | 8.32                   | 6.35                   | 8.62                    | 6.43                    | 5.25                    | 7.9                     | 4.54                    |
| I-11  | 30.4                          | 61.9                   | 34.2                   | 38.1                   | 67.3                    | 27.4                    | 31.9                    | 30.2                    | 18.3                    |
| LH-2  | 29.6                          | 29.6                   | 32.9                   | 34.4                   | 30.2                    | 56.9                    | 3.54                    | 1.4                     | 1.4                     |
| LH-4  | 5.01                          | 4.93                   | 4.01                   | 4.49                   | 3.93                    | 3.55                    | 3.8                     | 1.4                     | 4.08                    |
| LH-5  | 7.61                          | 16.3                   | 16.1                   | 15.2                   | 13.9                    | 21.3                    | 187                     | 60.5                    | 8.47                    |
| LH-7  | 20.4                          | 24.3                   | 30.7                   | 33.1                   | 33.6                    | 51.8                    | 27.3                    | 1.4                     | 1.4                     |
| LH-10 | 17.4                          | 25.9                   | 31.4                   | 33.1                   | 40.1                    | 38.1                    | 11.6                    | 15.1                    | 11.1                    |
| M-1   | 23.8                          | 209                    | 105                    | 42.1                   | 30.8                    | 22.4                    | 1.51                    | 10.1                    | 13.9                    |
| M-3   | 14.5                          | 19.3                   | 19.6                   | 19                     | 21.4                    | 11                      | 24.3                    | 1.4                     | 8.95                    |
| RA-9  | 12.6                          | 33.7                   | 32.1                   | 39.8                   | 39.5                    | 55.9                    | 24.8                    | 10.4                    | 19.1                    |
| RA-10 | 18.6                          | 109                    | 140                    | 26.2                   | 15.1                    | 7                       | 21.1                    | 5.91                    | 10.8                    |
| RA-11 | 20.8                          | 18.1                   | 21.1                   | 21.1                   | 24.3                    | 5.81                    | 4.06                    | 4.27                    | 1.4                     |
| RA-12 | 13.4                          | 30.2                   | 27.4                   | 29.1                   | 147                     | 55.1                    | 78                      | 1.4                     | 5.12                    |
| RA-13 | 14.4                          | 51.1                   | 52.2                   | 13                     | 47.9                    | 21.2                    | 9.48                    | 1.4                     | 1.4                     |
| RA-14 | 6.38                          | 11.5                   | 4.34                   | 3.6                    | 6.5                     | 9.73                    | 16.4                    | 7.01                    | 2.02                    |

**Table S7.** Saturation indices of pyrite, arsenian pyrite, orpiment, and realgar were calculated along the I-1 to RA-9 flow transect using the following formulas.

|                                                                                                                                    |     |
|------------------------------------------------------------------------------------------------------------------------------------|-----|
| $\text{Saturation Index} = \log[\text{reaction quotient } (Q)/\text{equilibrium constant } (K)]$                                   | (1) |
| $\log Q_{\text{pyrite}} = \log(\text{Fe}) + 2 \log(\text{SO}_4) - 16\text{pH} - 236.6\text{Eh}$                                    | (2) |
| $\log K_{\text{pyrite}} = -83.6063 \text{ (at } 25^\circ\text{C)}$                                                                 | (3) |
| $\log Q_{\text{arsenianpyrite}} = \log(\text{Fe}) + 1.995 \log(\text{SO}_4) - 16\text{pH} - 236.6\text{Eh} + 0.01 \log(\text{As})$ | (4) |
| $\log K_{\text{arsenianpyrite}} = -101.2263 \text{ (at } 25^\circ\text{C)}$                                                        | (5) |
| $\log Q_{\text{orpiment}} = 3 \log(\text{SO}_4) - 32\text{pH} - 405.6\text{Eh} + 2 \log(\text{As})$                                | (6) |
| $\log K_{\text{orpiment}} = -180.4364 \text{ (at } 25^\circ\text{C)}$                                                              | (7) |
| $\log Q_{\text{realgar}} = \log(\text{SO}_4) - 12\text{pH} - 152.1\text{Eh} + \log(\text{As})$                                     | (8) |
| $\log K_{\text{realgar}} = -69.889 \text{ (at } 25^\circ\text{C)}$                                                                 | (9) |

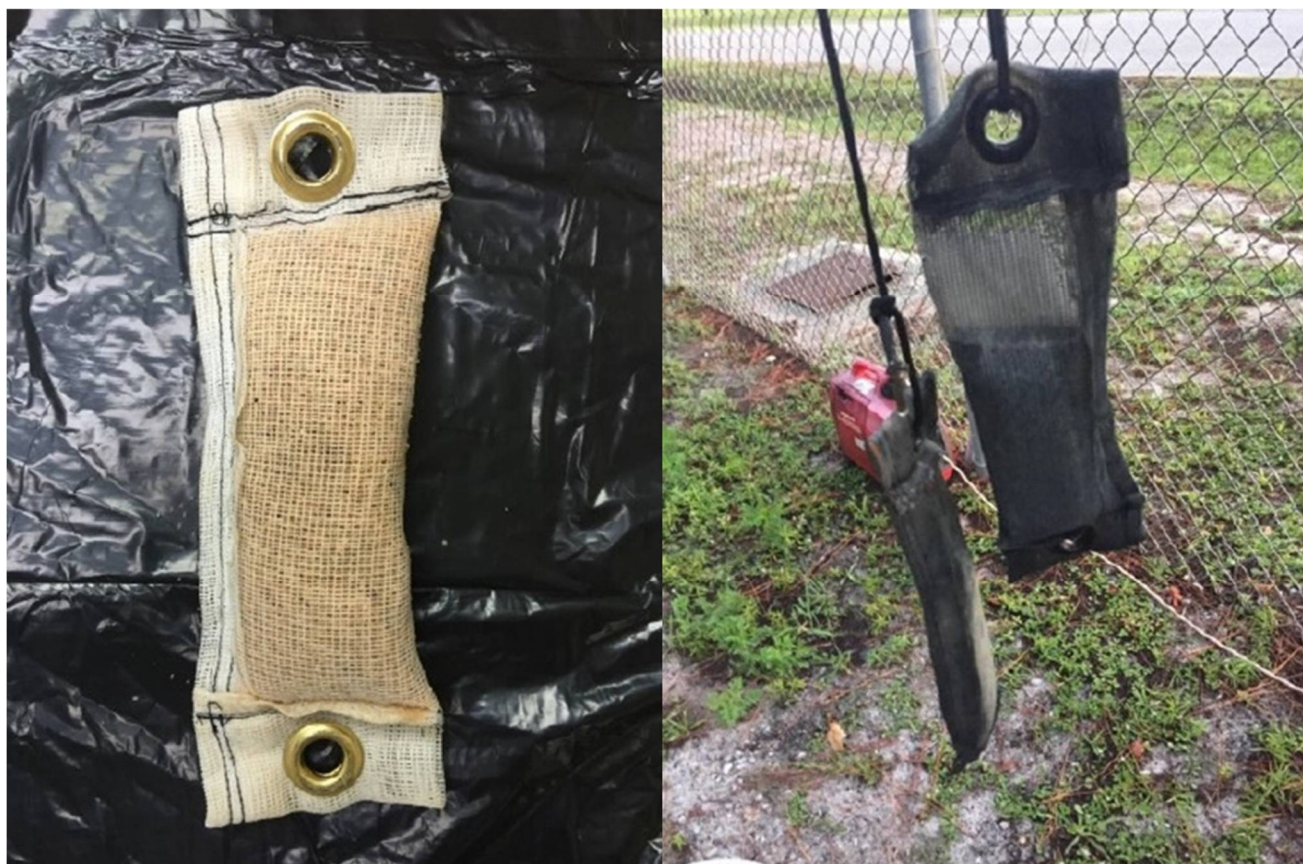

**Figure S1.** The sand bag installed prior to injection (left panel) and black precipitates observed on the sand bag 5 months after the injection (right panel). XRD and XRF analysis confirmed the black precipitate contained arsenian pyrite. .

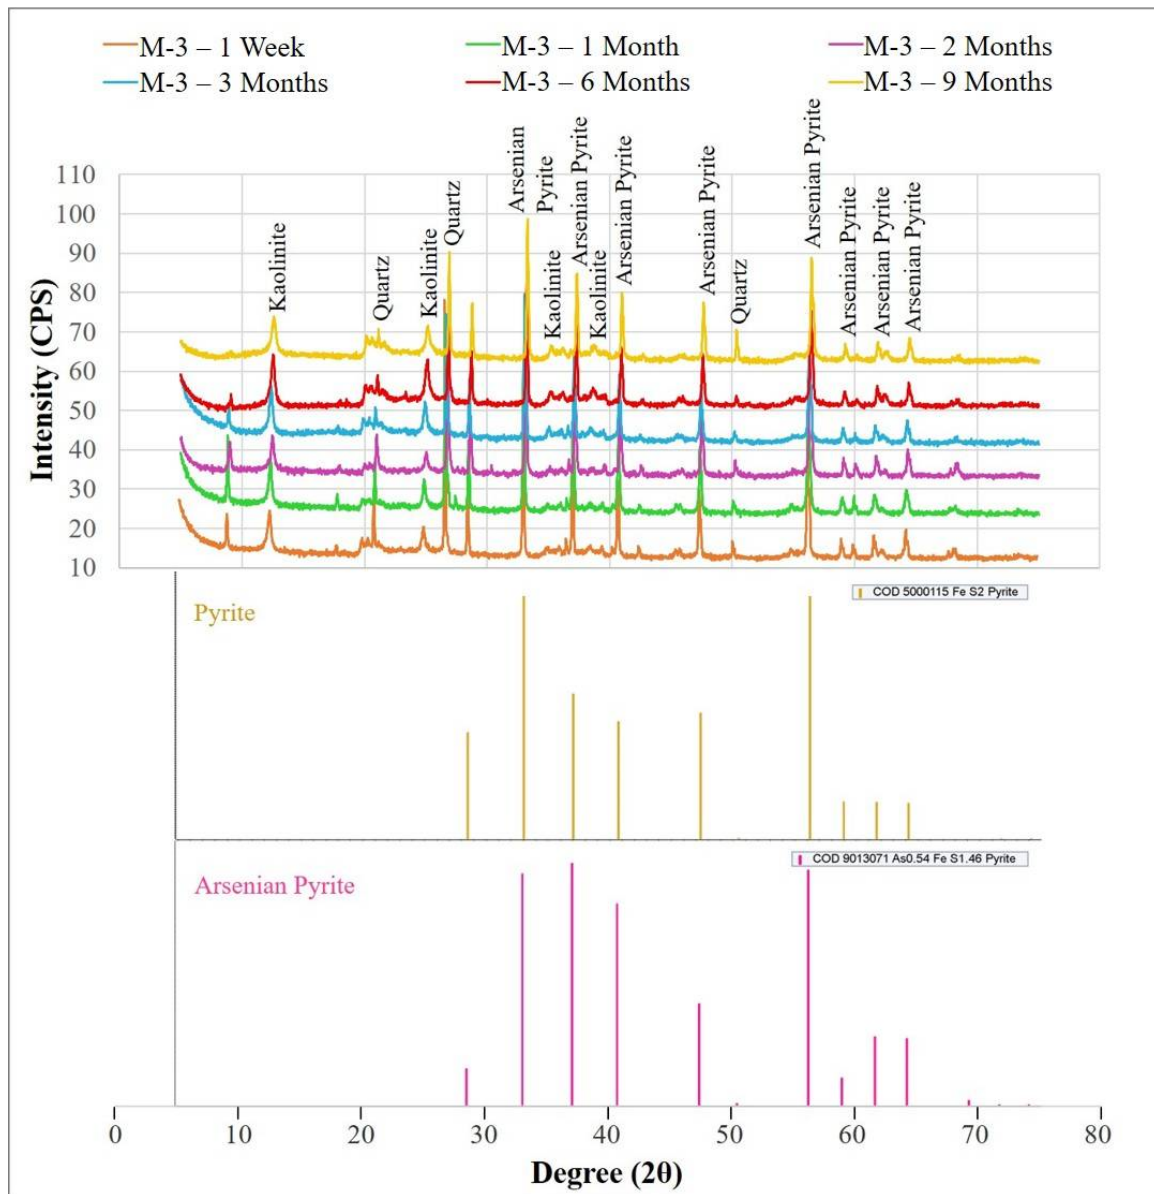

**Figure S2.** Peak positions of arsenian pyrite and pyrite, as confirmed from the COD database spectra, in the precipitated biominerals from monitoring well M-3. Distinct arsenian pyrite peaks are seen at the 2θ values of 28.5°, 33.0°, 37.0°, 40.7°, 47.3°, and 56.2°.

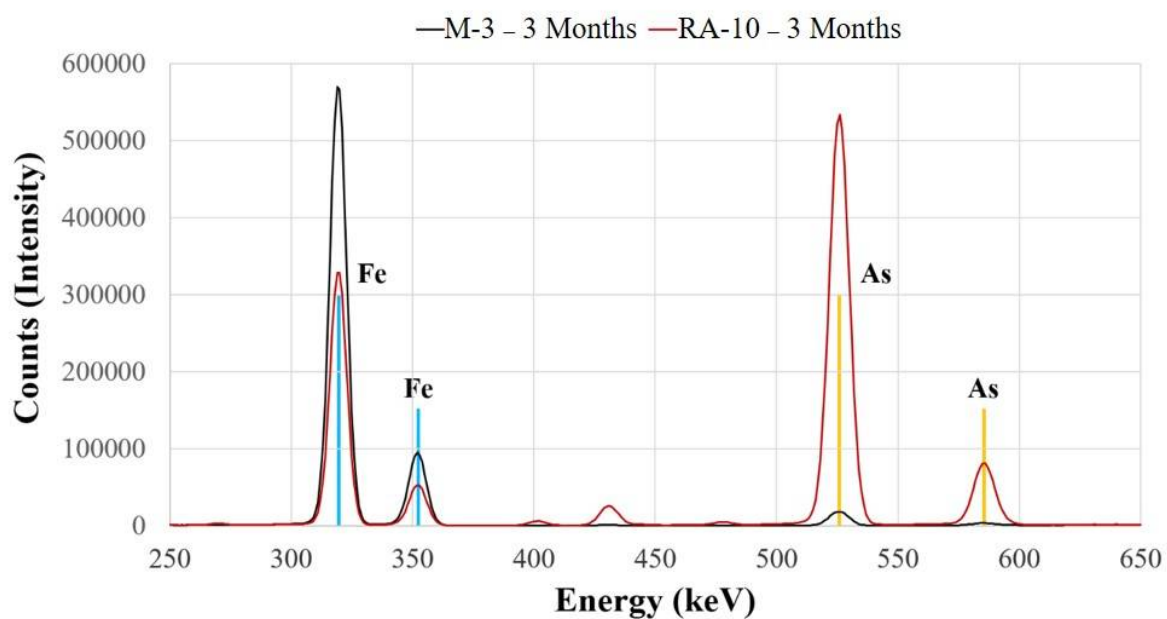

**Figure S3.** XRF spectra of biominerals from monitoring wells M-3 and RA-10 three months after the injection. The spectra from M-3 are representative of the Fe-rich spectral pattern with low-intensity arsenic peaks from 60% of the samples. The spectra from RA-10 represent the As- and Fe-rich spectral pattern from approximately 40% of the samples. The relative counts of arsenic increased throughout the following months, with a majority of the samples (52%) exhibiting medium-large As peaks after nine months. As a general note, sulfur cannot be detected with the XRF red filter, which was used to detect heavy elements above calcium like arsenic.

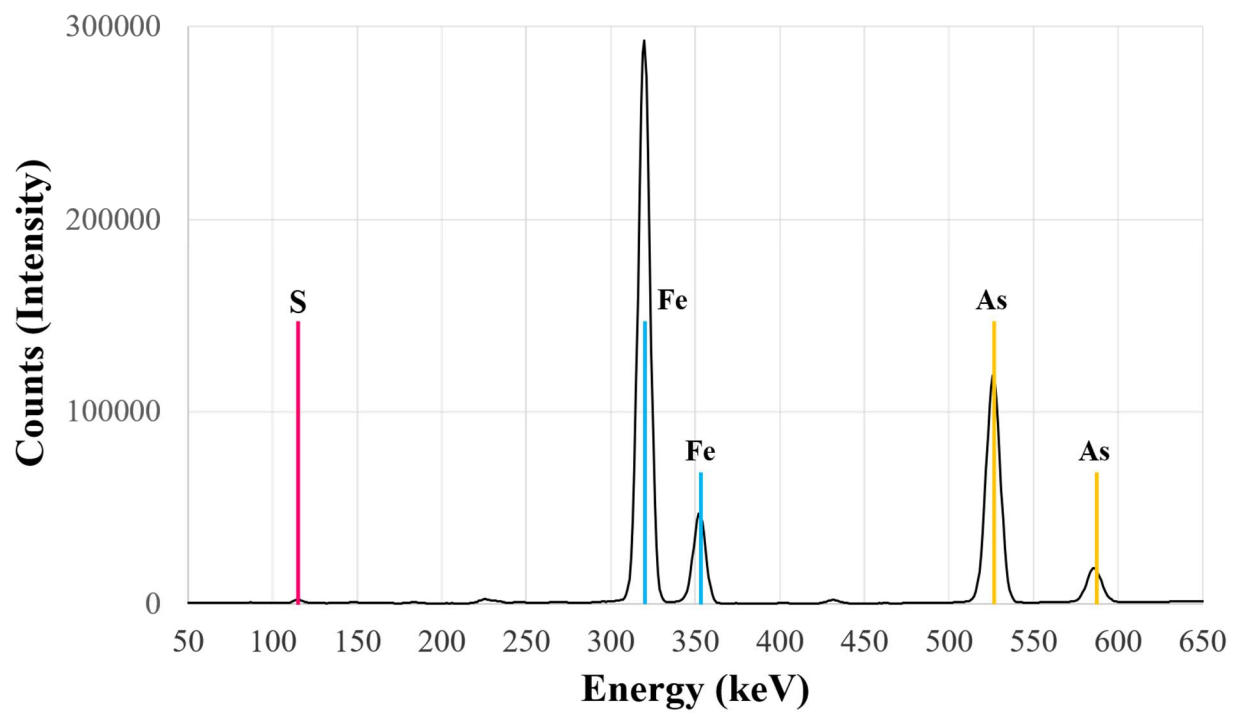

**Figure S4.** XRF spectra of biominerals from monitoring well RA-9 after one month of biostimulation, with the sulfur, iron, and arsenic peaks displayed. The XRF red filter, necessary for measuring arsenic, is designed mainly to detect heavy elements above calcium, explaining the low levels of sulfur in the XRF analysis of arsenian pyrite. .

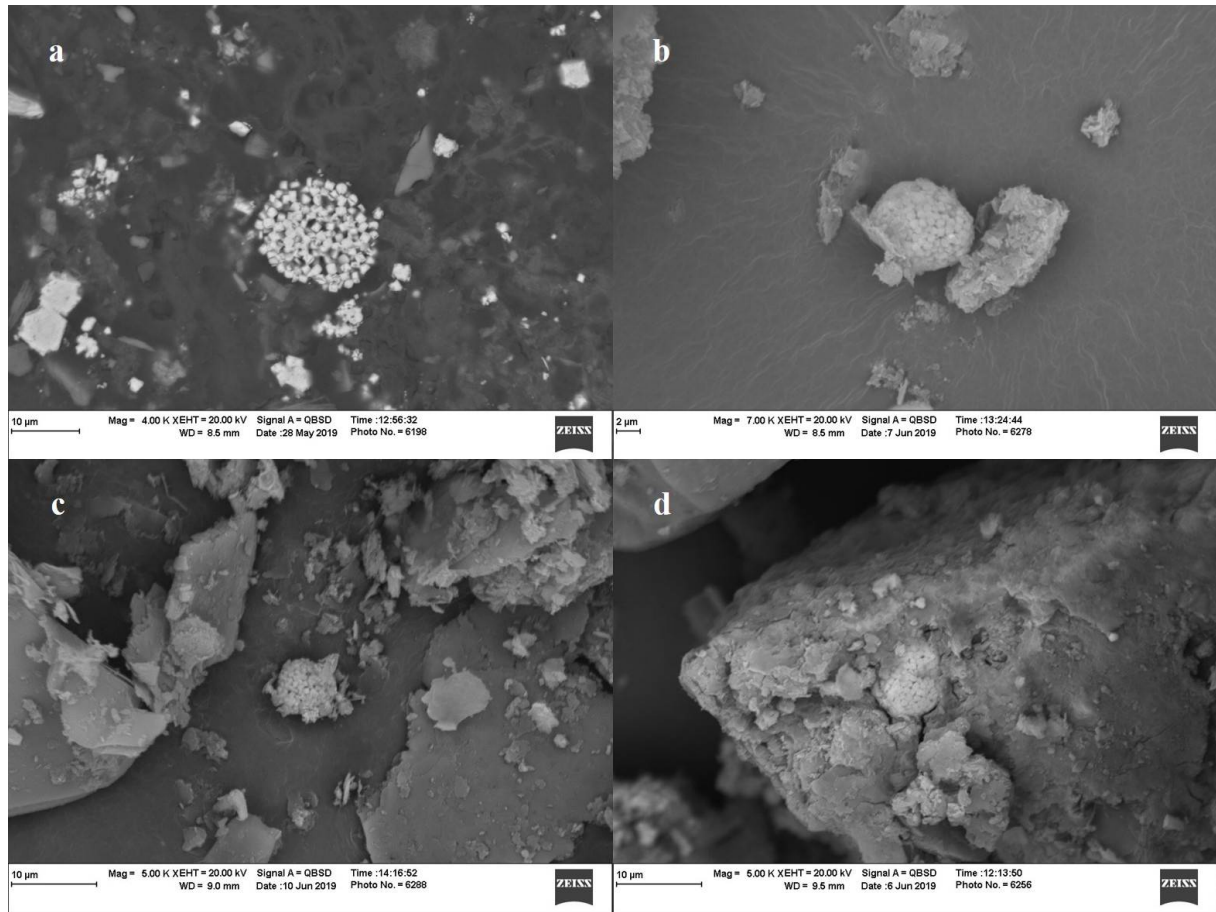

**Figure S5.** SEM backscatter images of arsenian pyrite from I-2 over the experiment duration. **(a)** A 15-μm arsenian pyrite framboid at 4,000x magnification two weeks post-injection. The framboid appears unconsolidated, with the nanocrystalline pyrite loosely held together. **(b)** An 8-μm arsenian pyrite framboid at 7,000x magnification three months post-injection. The framboid appears consolidated. **(c)** An 8-μm arsenian pyrite framboid at 5,000x magnification six months post-injection. **(d)** A 6-μm arsenian pyrite framboid at 5,000x magnification nine months post-injection.

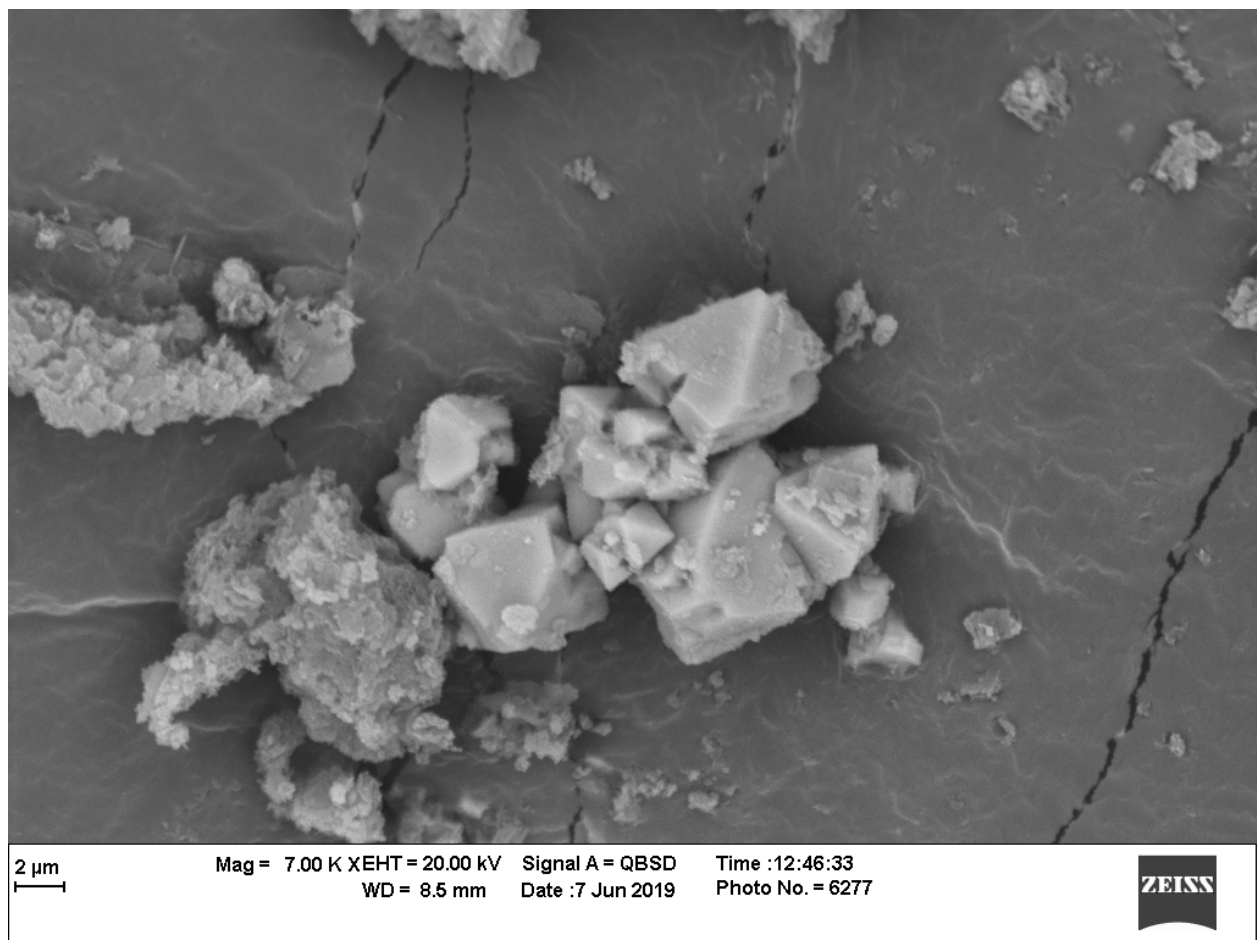

**Figure S6.** SEM backscatter image of 8- $\mu$ m euhedral pyrite crystals at 7,000x magnification from injection well I-2 three months post-injection. SEM chemical analysis confirmed the mineral as pyrite and not arsenian pyrite.

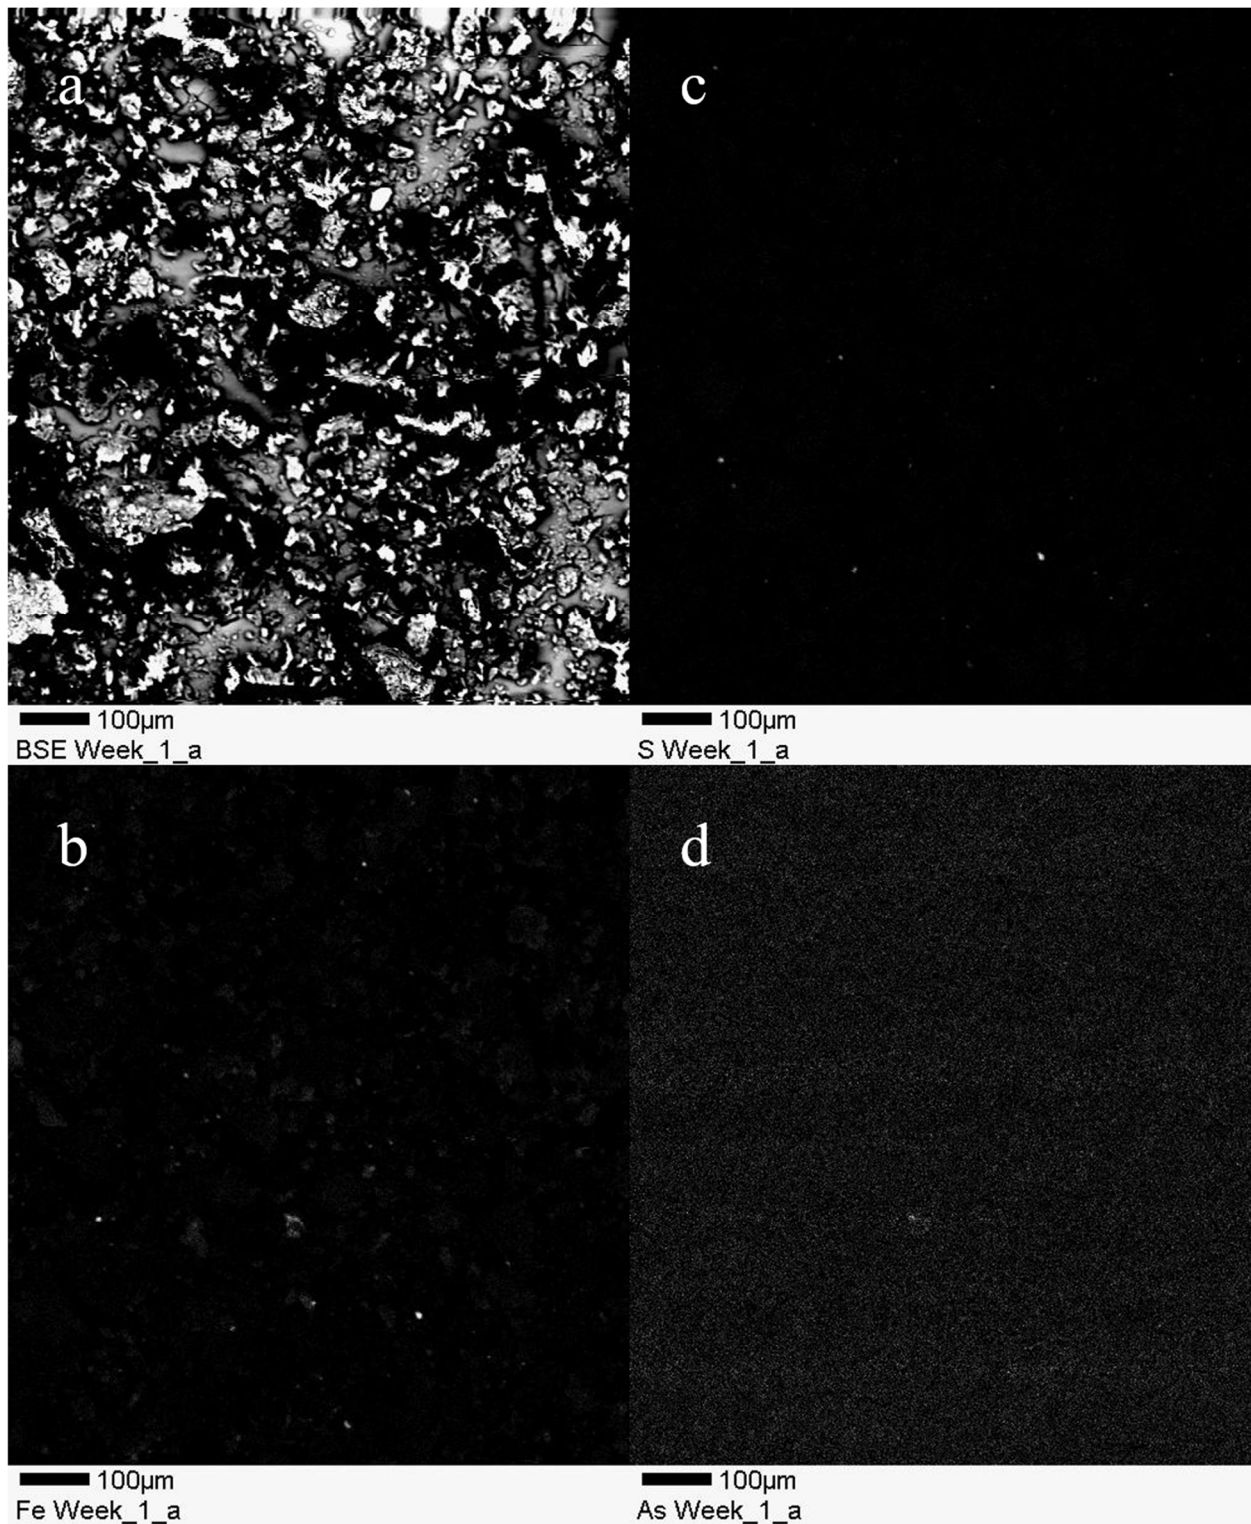

**Figure S7.** EMP backscatter images of solids and precipitated biominerals from injection well I-2 one week post-injection. (a) Backscatter image of the gold-covered stub (1,000  $\mu\text{m}$   $\times$  900  $\mu\text{m}$  area). (b) Backscatter mapping of iron in the grains. (c) S mapping in the grains. (d) As mapping in the grains. 15 grains in the thin sections of each sample were analyzed for the EMP mineralogical analysis (considering that some samples during the first week of the experiment had little arsenian pyrite formation), and 25 thin sections across the experiment duration were analyzed in the SEM imaging analysis. Overall, low concentrations of iron, sulfur, and arsenic are present.

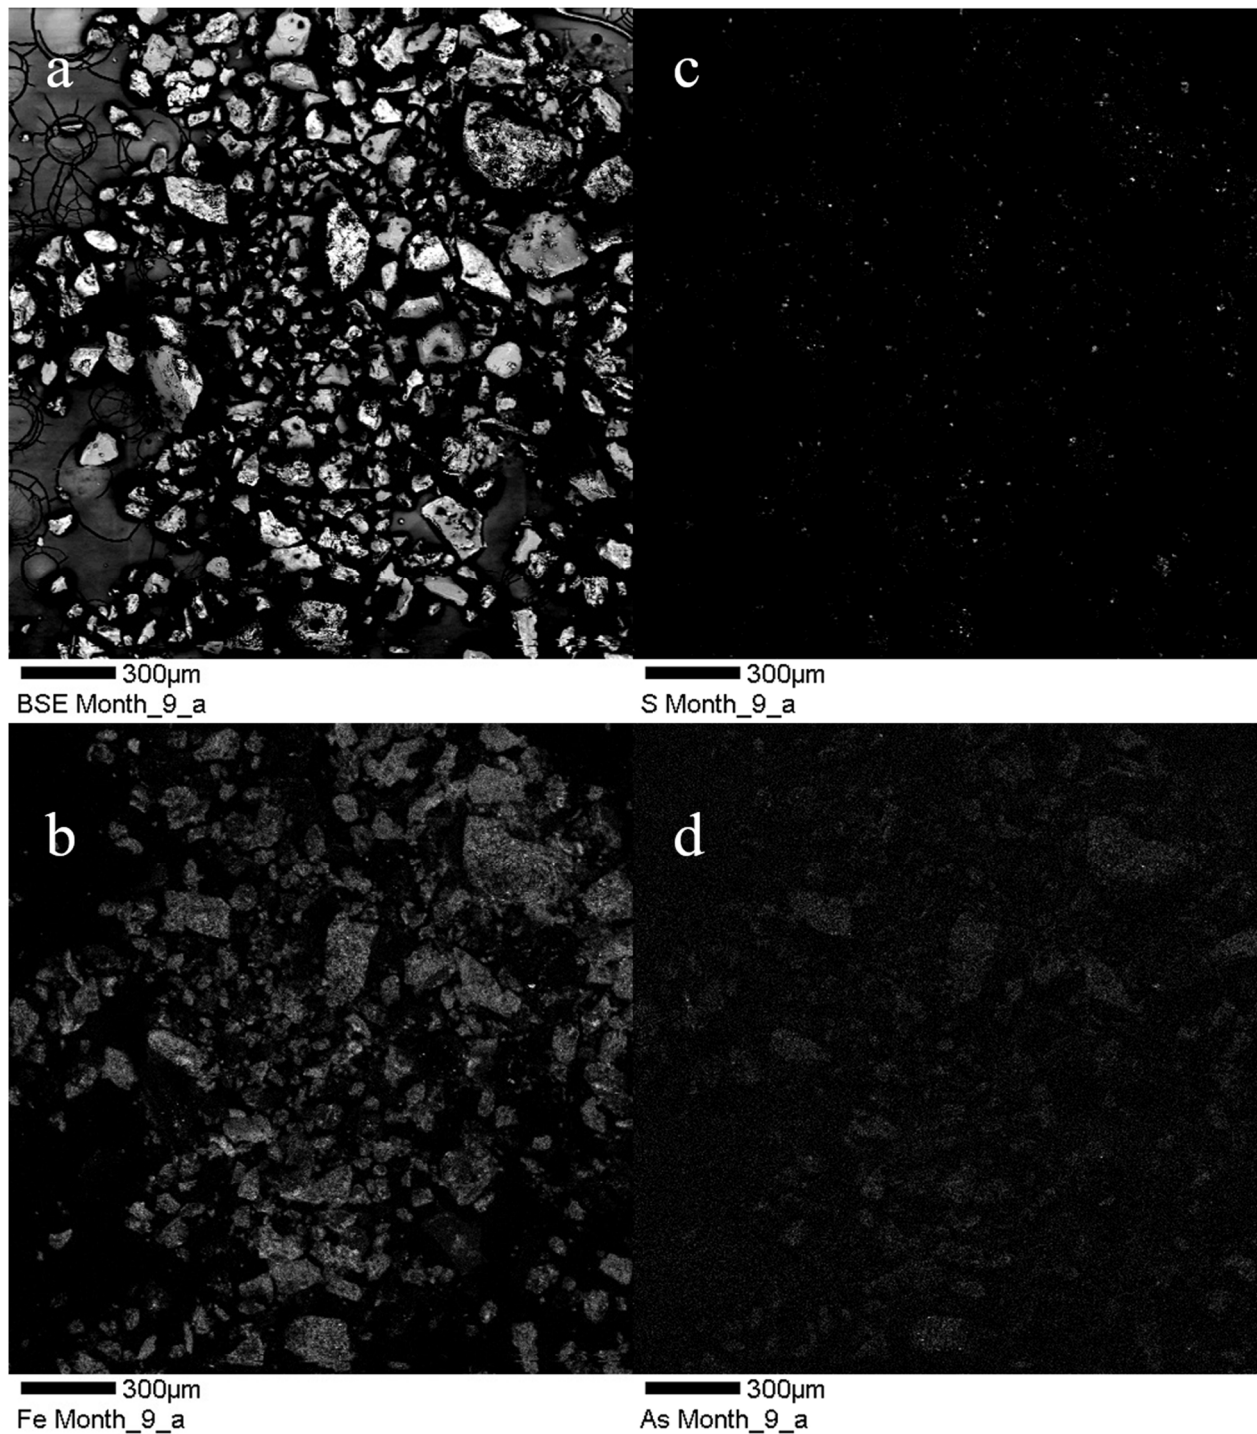

**Figure S8.** EMP backscatter images of solids and precipitated biominerals from injection well I-2 nine months post-injection. (a) Backscatter image of the gold-covered stub (2,400  $\mu\text{m}$   $\times$  1,950  $\mu\text{m}$  area). (b) Backscatter iron mapping in the grains. (c) S mapping in the grains. (d) As mapping in the grains. Overall, these grains and biominerals have higher concentrations of iron, sulfur, and arsenic compared to one week post-biostimulation. This increase in iron, sulfur, and arsenic indicates that over the course of bioremediation, pyrite increasingly precipitated and sequestered arsenic. These images also indicate the heterogeneity of arsenian pyrite, with arsenic present in the biominerals in certain spots and not evenly distributed throughout the grains.
